# Supplementary material for: Comparative Genomics of Synechococcus elongatus Explains the Phenotypic Diversity of the Strains
Source: PubMed Central journal article supplement (PMC9239245; doi:10.1128/mbio.00862-22), 2022-04-27

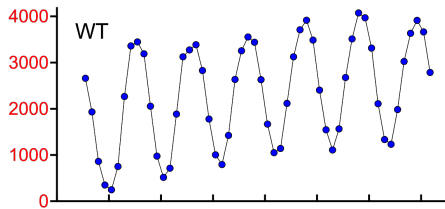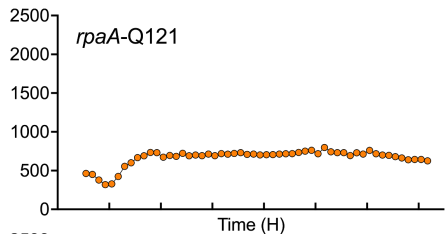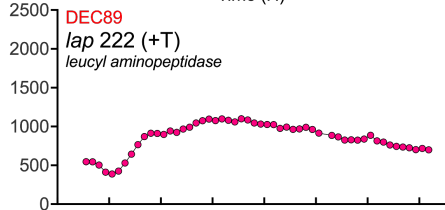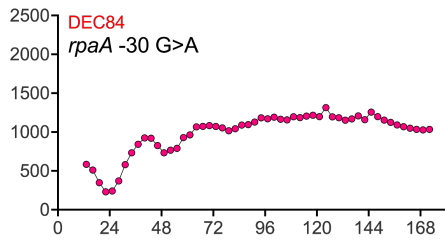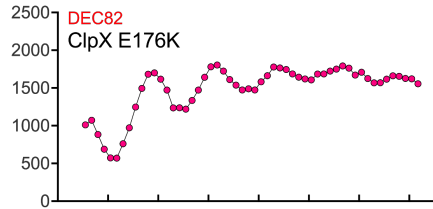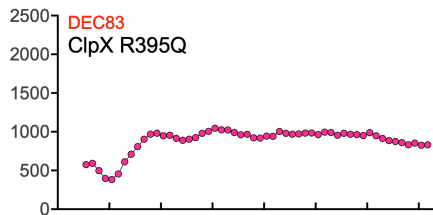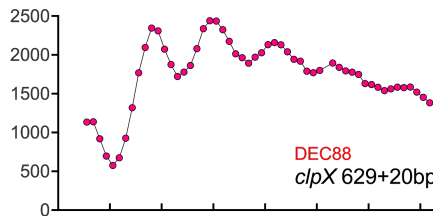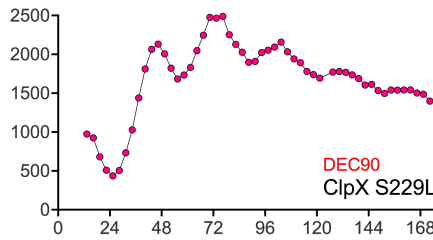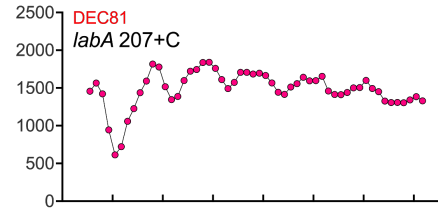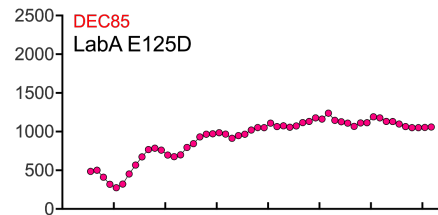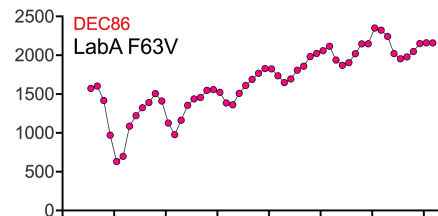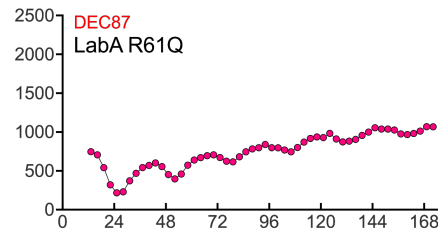

Supplement: mbio.00862-22-s0003.pdf [file mbio.00862-22-s0003.pdf]
