# Supplementary material for: Comparative Genomics of Synechococcus elongatus Explains the Phenotypic Diversity of the Strains
Source: PubMed Central journal article supplement (PMC9239245; doi:10.1128/mbio.00862-22), 2022-04-27
Supplement: mbio.00862-22-s0007.pdf [file mbio.00862-22-s0007.pdf]

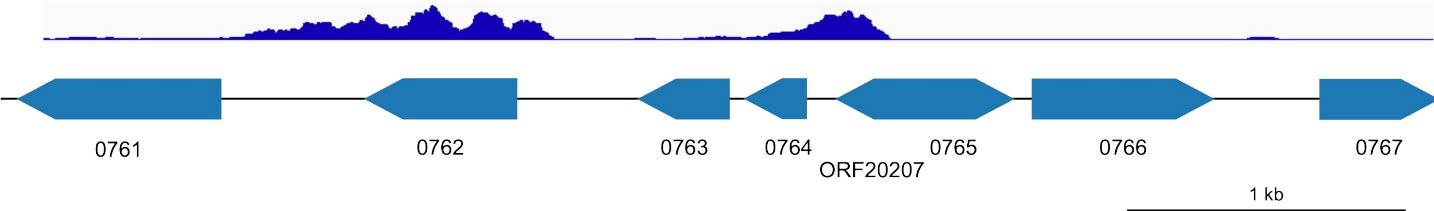

| <b>Locus</b>    | <b>Description</b>                                          |
|-----------------|-------------------------------------------------------------|
| Synpcc7942_0761 | conserved hypothetical protein DUF2971                      |
| Synpcc7942_0762 | DUF4065 phage-associated HTH antitoxin XRE family           |
| Synpcc7942_0763 | XRE family antitoxin, phage immunity repressor protein C    |
| Synpcc7942_0764 | XRE family antitoxin, phage immunity repressor protein C    |
| ORF02027        | XRE family HTH antidote protein HigA, Cro/C1 type           |
| Synpcc7942_0765 | tetraacyldisaccharide-1-P-4-kinase, tRNA methylation domain |
| Synpcc7942_0766 | Bro-N domain, phage antirepressor protein                   |
| Synpcc7942_0767 | transcription termination factor Rho                        |
