# Supplementary material for: Comparative Genomics of Synechococcus elongatus Explains the Phenotypic Diversity of the Strains
Source: PubMed Central journal article supplement (PMC9239245; doi:10.1128/mbio.00862-22), 2022-04-27
Supplement: mbio.00862-22-s0009.pdf [file mbio.00862-22-s0009.pdf]

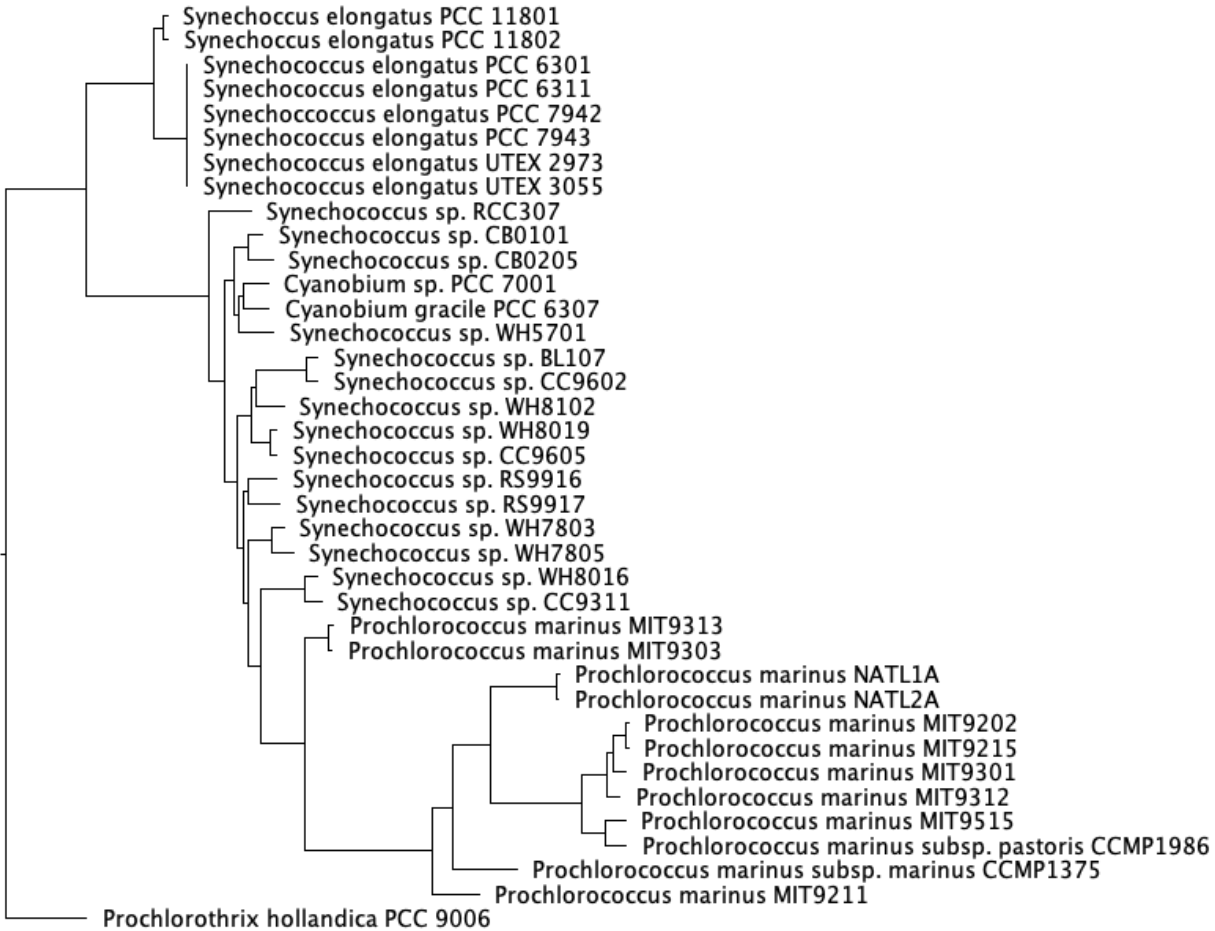

Tree scale = 0.2
